# Supplementary material for: Mass Spectrometric Characterization of HSV-1 L-Particles From Human Dendritic Cells and BHK21 Cells and Analysis of Their Functional Role
Source: Front Microbiol. 2020 Sep 29;11:1997. doi: 10.3389/fmicb.2020.01997 (PMC7550753; doi:10.3389/fmicb.2020.01997)
Supplement: Supplementary file 3 [file Table_3.xlsx]

## Sheet: Tabelle1
Proteins in mesocricetus auratus and homo sapiens	total: 630
Description	Protein
14-3-3 protein beta/alpha	YWHAB
14-3-3 protein epsilon	YWHAE
14-3-3 protein eta	YWHAH
14-3-3 protein gamma	YWHAG
14-3-3 protein theta	YWHAQ
14-3-3 protein zeta/delta	YWHAZ
26S protease regulatory subunit 10B	PSMC6
26S protease regulatory subunit 4	PSMC1
26S proteasome non-ATPase regulatory subunit 1	PSMD1
26S proteasome non-ATPase regulatory subunit 12	PSMD12
26S proteasome non-ATPase regulatory subunit 14	PSMD14
26S proteasome non-ATPase regulatory subunit 6	PSMD6
40S ribosomal protein S11	RPS11
40S ribosomal protein S12	RPS12
40S ribosomal protein S14	RPS14
40S ribosomal protein S17	RPS17
40S ribosomal protein S24	RPS24
40S ribosomal protein S27	RPS27L
40S ribosomal protein S3	RPS3
40S ribosomal protein S4 X isoform	RPS4X
40S ribosomal protein S5 (Fragment)	RPS5
40S ribosomal protein S6	RPS6
40S ribosomal protein S7	RPS7
40S ribosomal protein S8	RPS8
40S ribosomal protein SA (Fragment)	RPSA
4F2 cell-surface antigen heavy chain	SLC3A2
60 kDa heat shock protein mitochondrial	HSPD1
60S acidic ribosomal protein P0	RPLP0
60S acidic ribosomal protein P2	RPLP2
60S ribosomal protein L10a	RPL10A
60S ribosomal protein L11 (Fragment)	RPL11
60S ribosomal protein L12	RPL12
60S ribosomal protein L14	RPL14
60S ribosomal protein L18	RPL18
60S ribosomal protein L18a (Fragment)	RPL18A
60S ribosomal protein L21	RPL21
60S ribosomal protein L22 (Fragment)	RPL22
60S ribosomal protein L23	RPL23
60S ribosomal protein L23a	RPL23A
60S ribosomal protein L27a	RPL27A
60S ribosomal protein L3	RPL3
60S ribosomal protein L30 (Fragment)	RPL30
60S ribosomal protein L32 (Fragment)	RPL32
60S ribosomal protein L35	RPL35
60S ribosomal protein L38	RPL38
60S ribosomal protein L4	RPL4
60S ribosomal protein L6	RPL6
60S ribosomal protein L7	RPL7
60S ribosomal protein L7a	RPL7A
60S ribosomal protein L9 (Fragment)	RPL9
6-phosphogluconate dehydrogenase decarboxylating	PGD
78 kDa glucose-regulated protein	HSPA5
Abl interactor 1	ABI1
Acetyltransferase component of pyruvate dehydrogenase complex	DLAT
Actin cytoplasmic 1	ACTB
Actin-related protein 2	ACTR2
Actin-related protein 2/3 complex subunit 1B	ARPC1B
Actin-related protein 2/3 complex subunit 2	ARPC2
Actin-related protein 2/3 complex subunit 3	ARPC3
Actin-related protein 2/3 complex subunit 5	ARPC5
Actin-related protein 3	ACTR3
Acylamino-acid-releasing enzyme	A H
Acyl-CoA-binding protein	DBI
ADAM9 protein	ADAM9
Adenine phosphoribosyltransferase	APRT
Adenosine kinase	ADK
Adenosylhomocysteinase	AHCY
Adenylosuccinate synthetase isozyme 2	ADSS
Adenylyl cyclase-associated protein 1	CAP1
ADP/ATP translocase 2	SLC25A5
ADP-ribosylation factor 3	ARF3
ADP-ribosylation factor 4	ARF4
ADP-ribosylation factor 5	ARF5
ADP-ribosylation factor 6	ARF6
ADP-ribosylation factor-like protein 15	ARL15
ADP-ribosylation factor-like protein 8B	ARL8B
Alanine--tRNA ligase cytoplasmic	AARS
Alcohol dehydrogenase [NADP(+)]	AKR1A1
Aldehyde dehydrogenase mitochondrial	ALDH2
Aldose reductase	AKR1B1
Alpha-centractin	ACTR1A
Alpha-enolase	ENO1
Alpha-soluble NSF attachment protein	NAPA
AMP deaminase 2 (Fragment)	AMPD2
Annexin	ANXA6
Annexin A1	ANXA1
Annexin A11	ANXA11
Annexin A2	ANXA2
Annexin A4	ANXA4
Annexin A5	ANXA5
Annexin A6	ANXA6
Annexin A7	ANXA7
Anoctamin-6	ANO6
Anthrax toxin receptor 2	ANTXR2
Antithrombin-III	SERPINC1
AP-1 complex subunit beta-1	AP1B1
AP-1 complex subunit gamma-1	AP1G1
AP-1 complex subunit mu-1	AP1M1
AP-2 complex subunit alpha-2	AP2A2
AP-2 complex subunit beta	AP2B1
AP-2 complex subunit mu	AP2M1
Apolipoprotein A-I	APOA1
Apolipoprotein B-100	APOB
Apoptosis regulator BAX	BAX
Arginine--tRNA ligase cytoplasmic	RARS
Arsenical pump-driving ATPase (Fragment)	ASNA1
Asparagine--tRNA ligase cytoplasmic	NARS
Aspartate aminotransferase cytoplasmic	GOT1
Aspartate aminotransferase mitochondrial	GOT2
Aspartate--tRNA ligase cytoplasmic	DARS
Aspartyl aminopeptidase	DN P
ATP synthase subunit alpha mitochondrial	ATP5A1
ATP-binding cassette sub-family E member 1	ABCE1
ATP-citrate synthase	ACLY
ATP-dependent RNA helicase DDX1	DDX1
ATP-dependent RNA helicase DDX3X	DDX3X
Barrier-to-autointegration factor	BANF1
Basigin	BSG
Basigin	BSG
Basigin (Fragment)	BSG
Beta-hexosaminidase subunit beta	HEXB
Bifunctional glutamate/proline--tRNA ligase	EPRS
Bifunctional purine biosynthesis protein PURH	ATIC
Biliverdin reductase A	BLVRA
Bleomycin hydrolase	BLMH
Brain acid soluble protein 1	BASP1
BRO1 domain-containing protein BROX	BROX
C-1-tetrahydrofolate synthase cytoplasmic	MTHFD1
Calcyclin-binding protein	CACYBP
Calmodulin (Fragment)	CALM2
Calnexin	CANX
Calpain small subunit 1	CAPNS1
Calpain-2 catalytic subunit	CAPN2
Calpastatin	CAST
Calponin	CNN2
Calreticulin	CALR
Calumenin	CALU
Capping protein (Actin filament) muscle Z-line beta isoform CRA_d	CAPZB
Carbonyl reductase [NADPH] 3	CBR3
Catenin delta-1	CTNND1
Cation-dependent mannose-6-phosphate receptor	M6PR
Cation-independent mannose-6-phosphate receptor	IGF2R
CD2-associated protein	CD2AP
CD44 antigen	CD44
Cell division control protein 42 homolog	CDC42
Charged multivesicular body protein 4b	CHMP4B
Charged multivesicular body protein 6 (Fragment)	CHMP6
Chloride intracellular channel protein 1	CLIC1
Chloride intracellular channel protein 4	CLIC4
Choline transporter-like protein 1	SLC44A1
Choline transporter-like protein 2	SLC44A2
Chromosome 6 open reading frame 55 isoform CRA_b	VTA1
Citrate synthase mitochondrial	CS
Clathrin heavy chain 1	CLTC
Clathrin interactor 1	CLINT1
Clathrin light chain A	CLTA
Claudin domain-containing protein 1 (Fragment)	CLDND1
Coatomer subunit alpha	COPA
Coatomer subunit beta	COPB1
Coatomer subunit beta'	COPB2
Cofilin-1	CFL1
Cold shock domain-containing protein E1	CSDE1
Collagen type IV alpha-3-binding protein	COL4A3BP
Complement C3	C3
Complement component 1 Q subcomponent-binding protein mitochondrial	C1QBP
Constitutive coactivator of PPAR-gamma-like protein 1	FAM120A
COP9 signalosome complex subunit 8	COPS8
Copine-1	CPNE1
Copine-2	CPNE2
Copine-3	CPNE3
Coronin-1C	CORO1C
Crk-like protein	CRKL
Cullin-5	CUL5
Cullin-associated NEDD8-dissociated protein 1	CAND1
Cystatin-B	CSTB
Cysteine and glycine-rich protein 1	CSRP1
Cysteine--tRNA ligase cytoplasmic	CARS
Cytoplasmic aconitate hydratase	ACO1
Cytoplasmic dynein 1 heavy chain 1	DYNC1H1
Cytoplasmic dynein 1 light intermediate chain 1	DYNC1LI1
Cytoplasmic FMR1-interacting protein 1	CYFIP1
Cytoplasmic protein NCK1	NCK1
Cytoskeleton-associated protein 4	CKAP4
Cytosol aminopeptidase	LAP3
Cytosolic acyl coenzyme A thioester hydrolase	ACOT7
Cytosolic non-specific dipeptidase	CNDP2
D-3-phosphoglycerate dehydrogenase	PHGDH
Desmoglein-1	DSG1
Desmoplakin	DSP
Destrin	DSTN
Dihydropyrimidinase-related protein 2	DPYSL2
Diphosphomevalonate decarboxylase	MVD
Disintegrin and metalloproteinase domain-containing protein 10	ADAM10
DnaJ homolog subfamily A member 1	DNAJA1
DnaJ homolog subfamily A member 2	DNAJA2
DnaJ homolog subfamily C member 5	DNAJC5
DnaJ homolog subfamily C member 7	DNAJC7
Dolichyl-diphosphooligosaccharide--protein glycosyltransferase subunit 1	RPN1
Dolichyl-diphosphooligosaccharide--protein glycosyltransferase subunit DAD1	DAD1
Drebrin-like protein	DBNL
E3 ubiquitin-protein ligase Itchy homolog	ITCH
E3 ubiquitin-protein ligase UBR4	UBR4
EF-hand domain-containing protein D2	EFHD2
EH domain-containing protein 1	EHD1
EH domain-containing protein 4	EHD4
ELAV-like protein 1	ELAVL1
Elongation factor 1-alpha 1	EEF1A1
Elongation factor 1-beta	EEF1B2
Elongation factor 1-delta	EEF1D
Elongation factor 1-gamma	EEF1G
Elongation factor 2	EEF2
Elongation factor Tu mitochondrial	TUFM
Endoplasmic reticulum resident protein 44	ERP44
Endoplasmin	HSP90B1
Epithelial membrane protein 3 (Fragment)	EMP3
Eukaryotic initiation factor 4A-I	EIF4A1
Eukaryotic peptide chain release factor subunit 1	ETF1
Eukaryotic translation initiation factor 2 subunit 1	EIF2S1
Eukaryotic translation initiation factor 2 subunit 2	EIF2S2
Eukaryotic translation initiation factor 3 subunit C	EIF3C
Eukaryotic translation initiation factor 3 subunit F	EIF3F
Eukaryotic translation initiation factor 3 subunit J	EIF3J
Eukaryotic translation initiation factor 4H	EIF4H
Eukaryotic translation initiation factor 5	EIF5
Eukaryotic translation initiation factor 5A-1	EIF5A
Eukaryotic translation initiation factor 6	EIF6
Exocyst complex component 4	EXOC4
Exportin-1	XPO1
Extended synaptotagmin-1	ESYT1
Ezrin	EZR
F-actin-capping protein subunit alpha-1	CAPZA1
F-actin-capping protein subunit alpha-2	CAPZA2
Farnesyl pyrophosphate synthase	FDPS
Fascin	FSCN1
Fatty acid synthase	FASN
Fatty acid-binding protein epidermal	FABP5
Ferritin	FTH1
Fibronectin	FN1
Filamin-A	FLNA
Flavin reductase (NADPH)	BLVRB
Flotillin-2	FLOT2
Fructose-bisphosphate aldolase A	ALDOA
Fumarate hydratase mitochondrial	FH
Galectin-1	LGALS1
Galectin-3	LGALS3
Gamma-aminobutyric acid receptor-associated protein-like 2	GABARAPL2
Gamma-soluble NSF attachment protein	NAPG
Gelsolin	GSN
Glia maturation factor beta	GMFB
Glioma pathogenesis-related protein 1	GLIPR1
Glucose-6-phosphate 1-dehydrogenase	G6PD
Glucose-6-phosphate isomerase (Fragment)	GPI
Glutaredoxin-3	GLRX3
Glutathione reductase mitochondrial	GSR
Glutathione S-transferase P	GSTP1
Glyceraldehyde-3-phosphate dehydrogenase	GAPDH
Glycine--tRNA ligase	GARS
Glycogen [starch] synthase muscle	GYS1
Glycylpeptide N-tetradecanoyltransferase 1	NMT1
Golgi apparatus protein 1	GLG1
Golgi reassembly-stacking protein 2	GORASP2
Golgi-associated plant pathogenesis-related protein 1	GLIPR2
Golgin subfamily A member 7	GOLGA7
Growth factor receptor-bound protein 2 (Fragment)	GRB2
GTPase NRas	NRAS
GTP-binding protein Rheb	RHEB
GTP-binding protein SAR1a	SAR1A
Guanine nucleotide-binding protein G(i) subunit alpha-2	GNAI2
Guanine nucleotide-binding protein G(I)/G(S)/G(T) subunit beta-1	GNB1
Guanine nucleotide-binding protein G(I)/G(S)/G(T) subunit beta-2	GNB2
Guanine nucleotide-binding protein G(k) subunit alpha	GNAI3
Guanine nucleotide-binding protein G(s) subunit alpha isoforms XLas	GNAS
Heat shock 70 kDa protein 4	HSPA4
Heat shock cognate 71 kDa protein	HSPA8
Heat shock protein 105 kDa	HSPH1
Heat shock protein HSP 90-alpha	HSP90AA1
Heat shock protein HSP 90-beta	HSP90AB1
Hematological and neurological expressed 1 protein	HN1
Hemoglobin subunit beta	HBB
Heterogeneous nuclear ribonucleoprotein A1	HNRNPA1
Heterogeneous nuclear ribonucleoprotein A3	HNRNPA3
Heterogeneous nuclear ribonucleoprotein D0	HNRNPD
Heterogeneous nuclear ribonucleoprotein D-like	HNRNPDL
Heterogeneous nuclear ribonucleoprotein H3	HNRNPH3
Heterogeneous nuclear ribonucleoprotein K	HNRNPK
Heterogeneous nuclear ribonucleoprotein M	HNRNPM
Heterogeneous nuclear ribonucleoprotein Q	SYNCRIP
Heterogeneous nuclear ribonucleoprotein U	HNRNPU
Heterogeneous nuclear ribonucleoproteins A2/B1	HNRNPA2B1
Hexokinase-1	HK1
Histone H4	HIST1H4A
Histone-arginine methyltransferase CARM1	CARM1
Hsc70-interacting protein	ST13
Hsp90 co-chaperone Cdc37	CDC37
Hydroxymethylglutaryl-CoA synthase cytoplasmic	HMGCS1
Hypoxanthine-guanine phosphoribosyltransferase	HPRT1
Hypoxia up-regulated protein 1	HYOU1
Ig mu chain C region	IGHM
Immunoglobulin superfamily member 8	IGSF8
Importin subunit beta-1	KPNB1
Importin-5 (Fragment)	IPO5
Importin-9	IPO9
Inorganic pyrophosphatase	PPA1
Integrin alpha-5	ITGA5
Integrin alpha-6	ITGA6
Integrin alpha-IIb	ITGA2B
Integrin alpha-V	ITGAV
Integrin beta-1	ITGB1
Integrin-linked protein kinase	ILK
Inter-alpha-trypsin inhibitor heavy chain H2	ITIH2
Inter-alpha-trypsin inhibitor heavy chain H3	ITIH3
Intercellular adhesion molecule 1	ICAM1
IST1 homolog	IST1
ITIH4 protein	ITIH4
Junction plakoglobin	JUP
Keratin type I cytoskeletal 10	KRT10
Keratin type I cytoskeletal 14	KRT14
Keratin type I cytoskeletal 16	KRT16
Keratin type I cytoskeletal 17	KRT17
Keratin type I cytoskeletal 9	KRT9
Keratin type II cytoskeletal 1	KRT1
Keratin type II cytoskeletal 1b	KRT77
Keratin type II cytoskeletal 2 epidermal	KRT2
Keratin type II cytoskeletal 5	KRT5
Keratin type II cytoskeletal 6A	KRT6A
Keratin type II cytoskeletal 75	KRT75
Large neutral amino acids transporter small subunit 1	SLC7A5
Leucine-rich repeat flightless-interacting protein 1	LRRFIP1
Leucine--tRNA ligase cytoplasmic	LARS
Leucyl-cystinyl aminopeptidase	LNPEP
Leukotriene A-4 hydrolase	LTA4H
LIM and SH3 domain protein 1	LASP1
Low molecular weight phosphotyrosine protein phosphatase	ACP1
Lumican	LUM
Lupus La protein (Fragment)	SSB
Lysosome membrane protein 2	SCARB2
Lysosome-associated membrane glycoprotein 1	LAMP1
Lysosome-associated membrane glycoprotein 2	LAMP2
Macrophage migration inhibitory factor	MIF
Macrophage-capping protein	CAPG
Major vault protein	MVP
Malate dehydrogenase cytoplasmic	MDH1
Malate dehydrogenase mitochondrial	MDH2
Membrane-associated progesterone receptor component 1	PGRMC1
Microtubule-actin cross-linking factor 1 isoforms 1/2/3/5	MACF1
Microtubule-associated protein RP/EB family member 1	MAPRE1
Minor histocompatibility antigen H13	HM13
Mitogen-activated protein kinase kinase kinase kinase 4	MAP4K4
Moesin	MSN
Monocyte differentiation antigen CD14	CD14
Multidrug resistance-associated protein 1	ABCC1
Multifunctional protein ADE2	PAICS
Multivesicular body subunit 12A	MVB12A
Myeloid-associated differentiation marker	MYADM
Myoferlin	MYOF
Myosin light polypeptide 6	MYL6
Myosin-2	MYH2
Myotrophin	MTPN
Myristoylated alanine-rich C-kinase substrate	MARCKS
Na(+)/H(+) exchange regulatory cofactor NHE-RF1	SLC9A3R1
NEDD8-conjugating enzyme Ubc12	UBE2M
Neuroplastin	NPTN
Neutral alpha-glucosidase AB	GANAB
Neutral amino acid transporter A	SLC1A4
Neutral amino acid transporter B(0)	SLC1A5
Niban-like protein 1	FAM129B
Nicastrin	NCSTN
Non-specific serine/threonine protein kinase	MARK2
NSFL1 cofactor p47	NSFL1C
Nuclear migration protein nudC	NUDC
Nucleobindin-1	NUCB1
Nucleolin	NCL
Nucleosome assembly protein 1-like 1	NAP1L1
Nucleosome assembly protein 1-like 4 (Fragment)	NAP1L4
Obg-like ATPase 1	OLA1
Oxysterol-binding protein 1	OSBP
P2X purinoceptor 4	P2RX4
Palladin	PALLD
Peflin	PEF1
Peptidyl-prolyl cis-trans isomerase A	PPIA
Peptidyl-prolyl cis-trans isomerase B	PPIB
Peptidyl-prolyl cis-trans isomerase FKBP1A	FKBP1A
Peptidyl-prolyl cis-trans isomerase FKBP4	FKBP4
Peroxiredoxin-1	PRDX1
Peroxiredoxin-2	PRDX2
Peroxiredoxin-4	PRDX4
Peroxiredoxin-6	PRDX6
Phosphate carrier protein mitochondrial	SLC25A3
Phosphatidylethanolamine-binding protein 1	PEBP1
Phosphatidylinositol 4-kinase alpha	PI4KA
Phosphoglycerate mutase 1	PGAM1
Phosphoserine aminotransferase	PSAT1
Pigment epithelium-derived factor	SERPINF1
Plasma membrane calcium-transporting ATPase 1	ATP2B1
Plasma membrane calcium-transporting ATPase 4	ATP2B4
Plasminogen	PLG
Platelet glycoprotein 4	CD36
Platelet-activating factor acetylhydrolase IB subunit alpha	PAFAH1B1
Plexin-A1	PLXNA1
Plexin-B2	PLXNB2
Poly(rC)-binding protein 1	PCBP1
Poly(rC)-binding protein 2	PCBP2
Polyadenylate-binding protein 1	PABPC1
Pre-mRNA-splicing factor ATP-dependent RNA helicase DHX15	DHX15
Probable ATP-dependent RNA helicase DDX6	DDX6
Profilin-1	PFN1
Programmed cell death 6-interacting protein	PDCD6IP
Programmed cell death protein 6	PDCD6
Prohibitin	PHB
Proliferation-associated protein 2G4	PA2G4
Prolow-density lipoprotein receptor-related protein 1	LRP1
Prolyl endopeptidase	PREP
Prosaposin	PSAP
Prostaglandin E synthase 3	PTGES3
Prostaglandin F2 receptor negative regulator	PTGFRN
Proteasome activator complex subunit 2	PSME2
Proteasome subunit alpha type	PSMA2
Proteasome subunit alpha type-3	PSMA3
Proteasome subunit alpha type-4	PSMA4
Proteasome subunit alpha type-5	PSMA5
Proteasome subunit alpha type-6	PSMA6
Proteasome subunit alpha type-7	PSMA7
Proteasome subunit beta type-1	PSMB1
Proteasome subunit beta type-2	PSMB2
Proteasome subunit beta type-6	PSMB6
Protein arginine N-methyltransferase 1	PRMT1
Protein disulfide-isomerase	P4HB
Protein disulfide-isomerase A3	PDIA3
Protein disulfide-isomerase A6	PDIA6
Protein DJ-1	PARK7
Protein EFR3 homolog A	EFR3A
Protein FAM234A	FAM234A
Protein flightless-1 homolog	FLII
Protein kinase C beta type	PRKCB
Protein MEMO1	MEMO1
Protein phosphatase 1 regulatory subunit 7 (Fragment)	PPP1R7
Protein S100-A10	S100A10
Protein S100-A11	S100A11
Protein S100-A4	S100A4
Protein SEC13 homolog	SEC13
Protein transport protein Sec23B	SEC23B
Protein transport protein Sec31A	SEC31A
Protein-L-isoaspartate O-methyltransferase	PCMT1
Prothrombin	F2
Pyruvate kinase PKM	PKM
Rab GDP dissociation inhibitor alpha	GDI1
Rab GDP dissociation inhibitor beta	GDI2
Rabankyrin-5	ANKFY1
Radixin	RDX
Ragulator complex protein LAMTOR1	LAMTOR1
Ran GTPase-activating protein 1	RANGAP1
Ran-specific GTPase-activating protein	RANBP1
Ras GTPase-activating protein-binding protein 1	G3BP1
Ras GTPase-activating-like protein IQGAP1	IQGAP1
Ras suppressor protein 1	RSU1
Ras-related C3 botulinum toxin substrate 1	RAC1
Ras-related protein Rab-10	RAB10
Ras-related protein Rab-11B	RAB11B
Ras-related protein Rab-12	RAB12
Ras-related protein Rab-14	RAB14
Ras-related protein Rab-18	RAB18
Ras-related protein Rab-1A	RAB1A
Ras-related protein Rab-1B	RAB1B
Ras-related protein Rab-21	RAB21
Ras-related protein Rab-23	RAB23
Ras-related protein Rab-27A (Fragment)	RAB27A
Ras-related protein Rab-2A	RAB2A
Ras-related protein Rab-34 isoform NARR (Fragment)	RAB34
Ras-related protein Rab-4B	RAB4B
Ras-related protein Rab-5A	RAB5A
Ras-related protein Rab-5B	RAB5B
Ras-related protein Rab-5C	RAB5C
Ras-related protein Rab-6A	RAB6A
Ras-related protein Rab-7a	RAB7A
Ras-related protein Rab-8A	RAB8A
Ras-related protein Ral-A (Fragment)	RALA
Ras-related protein Ral-B (Fragment)	RALB
Ras-related protein Rap-1A	RAP1A
Ras-related protein Rap-1b	RAP1B
Ras-related protein Rap-2b	RAP2B
Ras-related protein Rap-2c	RAP2C
Ras-related protein R-Ras	RRAS
Receptor of activated protein C kinase 1	RACK1
Regulator of nonsense transcripts 1	UPF1
Reticulocalbin-1	RCN1
Reticulon	RTN3
Reticulon-3	RTN3
Rho GDP-dissociation inhibitor 1	ARHGDIA
Rho GTPase-activating protein 1	ARHGAP1
Rho-related GTP-binding protein RhoC (Fragment)	RHOC
Rho-related GTP-binding protein RhoG	RHOG
Ribonuclease inhibitor	RNH1
Ribosomal protein L19	RPL19
Ribosomal protein S6 kinase alpha-3	RPS6KA3
RuvB-like 2	RUVBL2
S-adenosylmethionine synthase isoform type-2	MAT2A
Sarcoplasmic/endoplasmic reticulum calcium ATPase 2	ATP2A2
Sec1 family domain-containing protein 1	SCFD1
Secretory carrier-associated membrane protein 2	SCAMP2
Secretory carrier-associated membrane protein 3	SCAMP3
Septin 11 isoform CRA_b	SEPT11
Septin-7	SEPT7
Septin-9	SEPT9
Sequestosome-1	SQSTM1
Serine incorporator 1	SERINC1
Serine/threonine-protein kinase 10	STK10
Serine/threonine-protein kinase PAK 2	PAK2
Serine/threonine-protein phosphatase 2A 65 kDa regulatory subunit A alpha isoform	PPP2R1A
Serine/threonine-protein phosphatase 2A catalytic subunit alpha isoform	PPP2CA
Serine/threonine-protein phosphatase PP1-alpha catalytic subunit	PPP1CA
Serine-threonine kinase receptor-associated protein	STRAP
Serine--tRNA ligase cytoplasmic	SARS
Serpin B6	SERPINB6
Serpin H1 (Fragment)	SERPINH1
Serum albumin	ALB
S-formylglutathione hydrolase	ESD
SH3 domain-binding glutamic acid-rich-like protein	SH3BGRL
SH3 domain-containing kinase-binding protein 1 (Fragment)	SH3KBP1
Signal peptide peptidase-like 2A (Fragment)	SPPL2A
Small glutamine-rich tetratricopeptide repeat-containing protein alpha	SGTA
Sodium/potassium-transporting ATPase subunit alpha-1	ATP1A1
Sodium/potassium-transporting ATPase subunit beta-1	ATP1B1
Sodium/potassium-transporting ATPase subunit beta-3	ATP1B3
Sorcin	SRI
Sorting nexin-1	SNX1
Sorting nexin-27	SNX27
Sorting nexin-5	SNX5
Sorting nexin-6	SNX6
Sorting nexin-9	SNX9
Spectrin alpha chain non-erythrocytic 1	SPTAN1
Spectrin beta chain non-erythrocytic 1	SPTBN1
S-phase kinase-associated protein 1 (Fragment)	SKP1
Spliceosome RNA helicase DDX39B	DDX39B
Splicing factor U2AF 65 kDa subunit	U2AF2
Staphylococcal nuclease domain-containing protein 1	SND1
Stress-70 protein mitochondrial	HSPA9
Stress-induced-phosphoprotein 1	STIP1
Superoxide dismutase [Cu-Zn]	SOD1
Synaptic vesicle membrane protein VAT-1 homolog	VAT1
Synaptobrevin homolog YKT6	YKT6
Synaptophysin-like protein 1	SYPL1
Synaptosomal-associated protein 29	SNAP29
Syndecan binding protein (Syntenin) isoform CRA_a	SDCBP
Syntaxin-12	STX12
Syntaxin-4	STX4
Syntenin-1	SDCBP
Tax1-binding protein 3	TAX1BP3
T-complex protein 1 subunit alpha	TCP1
T-complex protein 1 subunit beta	CCT2
T-complex protein 1 subunit delta	CCT4
T-complex protein 1 subunit epsilon	CCT5
T-complex protein 1 subunit eta	CCT7
T-complex protein 1 subunit gamma	CCT3
T-complex protein 1 subunit theta	CCT8
T-complex protein 1 subunit zeta	CCT6A
Tetraspanin	CD81
Tetraspanin (Fragment)	TSPAN14
Thioredoxin	TXN
Thioredoxin domain-containing protein 5	TXNDC5
Thioredoxin reductase 1 cytoplasmic	TXNRD1
Thioredoxin-like protein 1	TXNL1
Threonine--tRNA ligase cytoplasmic	TARS
Thrombospondin-1	THBS1
Transaldolase	TALDO1
Transcriptional activator protein Pur-beta	PURB
Transferrin receptor protein 1	TFRC
Transforming protein RhoA	RHOA
Transgelin-2	TAGLN2
Transitional endoplasmic reticulum ATPase	VCP
Transketolase	TKT
Translationally-controlled tumor protein	TPT1
Transmembrane 9 superfamily member	TM9SF4
Transmembrane 9 superfamily member 2	TM9SF2
Transmembrane 9 superfamily member 3	TM9SF3
Transmembrane emp24 domain-containing protein 10	TMED10
Transmembrane emp24 domain-containing protein 2 (Fragment)	TMED2
Transmembrane protein 165	TMEM165
Transmembrane protein 33 (Fragment)	TMEM33
Transportin-1	TNPO1
Trifunctional purine biosynthetic protein adenosine-3	GART
Triosephosphate isomerase	TPI1
Tropomyosin alpha-4 chain	TPM4
Tubulin alpha-4A chain	TUBA4A
Tubulin beta chain	TUBB
Tubulin beta-4B chain	TUBB4B
Tubulin beta-6 chain	TUBB6
Tubulin-folding cofactor B	TBCB
Tumor susceptibility gene 101 protein	TSG101
Twinfilin-1	TWF1
Tyrosine-protein kinase CSK	CSK
Tyrosine-protein phosphatase non-receptor type 11	PTPN11
Tyrosine-protein phosphatase non-receptor type substrate 1	SIRPA
Tyrosine--tRNA ligase cytoplasmic	YARS
Ubiquitin carboxyl-terminal hydrolase 5	USP5
Ubiquitin carboxyl-terminal hydrolase isozyme L3	UCHL3
Ubiquitin thioesterase OTUB1	OTUB1
Ubiquitin-conjugating enzyme E2 K	UBE2K
Ubiquitin-conjugating enzyme E2 L3	UBE2L3
Ubiquitin-conjugating enzyme E2 N	UBE2N
Ubiquitin-like modifier-activating enzyme 1	UBA1
UMP-CMP kinase	CMPK1
Uncharacterized protein	4 SV
Unconventional myosin-Ic	MYO1C
UTP--glucose-1-phosphate uridylyltransferase	UGP2
Vacuolar protein sorting-associated protein 26A	VPS26A
Vacuolar protein sorting-associated protein 28 homolog (Fragment)	VPS28
Vacuolar protein sorting-associated protein 29	VPS29
Vacuolar protein sorting-associated protein 35	VPS35
Vacuolar protein sorting-associated protein 4A	VPS4A
Vacuolar protein sorting-associated protein 4B	VPS4B
Valine--tRNA ligase	VARS
Vesicle-associated membrane protein 3	VAMP3
Vesicle-associated membrane protein 8	VAMP8
Vimentin	VIM
Vinculin	VCL
Vitronectin	VTN
Voltage-dependent anion-selective channel protein 2 (Fragment)	VDAC2
V-type proton ATPase 116 kDa subunit a isoform 1	ATP6V0A1
V-type proton ATPase subunit B brain isoform	ATP6V1B2
V-type proton ATPase subunit d 1	ATP6V0D1
V-type proton ATPase subunit E 1	ATP6V1E1
WASH complex subunit 2C	WASHC2C
WASH complex subunit 5	WASHC5
WD repeat-containing protein 1	WDR1
WD repeat-containing protein 48	WDR48
Wiskott-Aldrich syndrome protein family member 2	WASF2
WW domain-binding protein 2	WBP2
Zinc finger CCCH-type antiviral protein 1	ZC3HAV1
Zinc transporter ZIP10	SLC39A10
Zyxin	ZYX
